# Supplementary material
Source: PubMed Central journal article supplement (PMC5607080)
Supplement: NIHMS877520-supplement-MEEHANSUPPLEMENTAL.pdf [file NIHMS877520-supplement-MEEHANSUPPLEMENTAL.pdf]

**Figure S1.** The W measure of ROI-to-ROI DFC largely reflects the balance of positive and negative coefficients from ROI A to ROI B, which is captured by the PR measure. Points indicate approximately 10,000 measurements of ROI-to-ROI DFC between the DAN and VOC. Yellow line indicates best linear fit. W and PR are highly correlated at  $r = 0.79$ , which corresponds to  $\sim 60\%$  shared variance. Because a coefficient's sign is less subject to estimation error than its magnitude, we considered PR as the more accurate measure of ROI-to-ROI DFC.

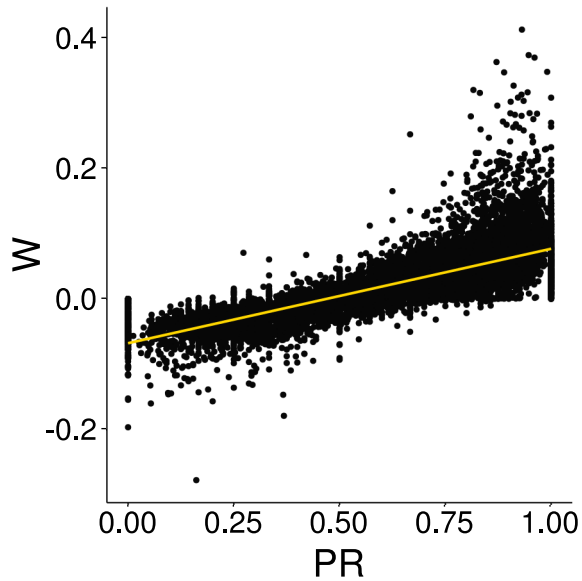

**Figure S2.** Flowchart describing the analysis steps.

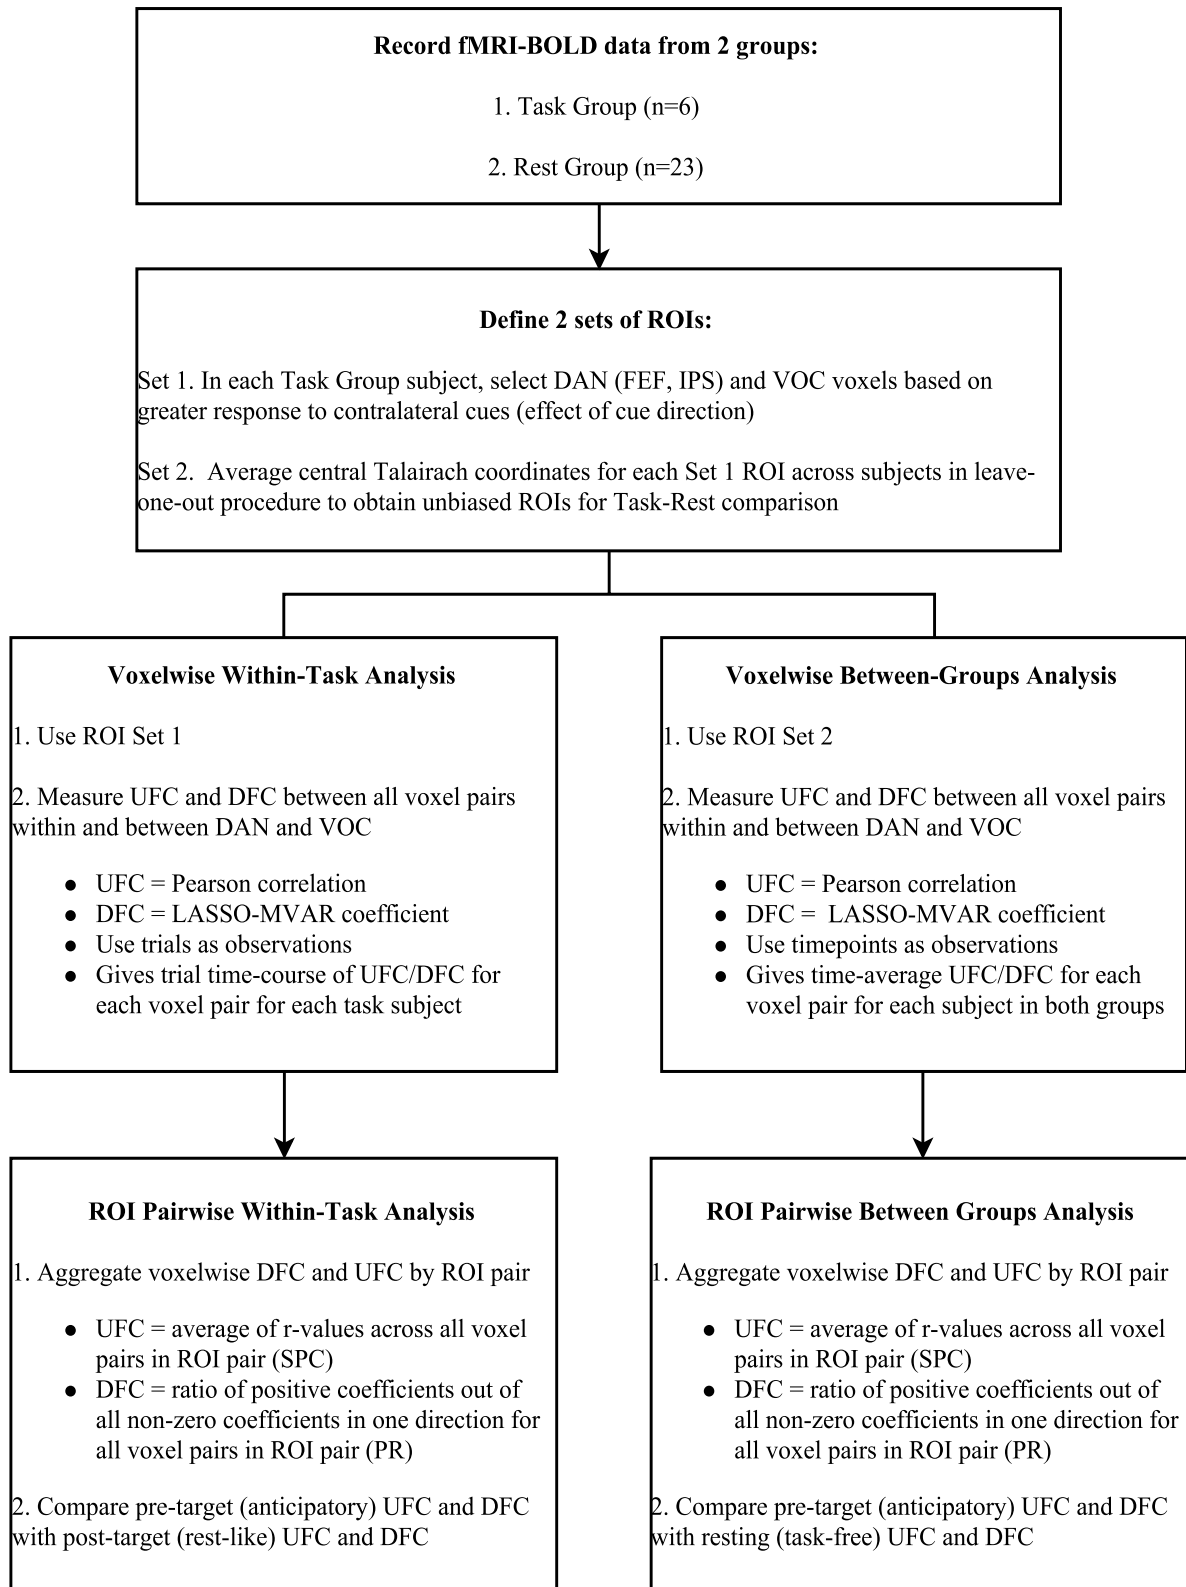

**Tables S1-S6.** Comparisons of ANOVAs computed with the aov function and ANOVAs derived from multi-level models using the lme4 package in R for the between-groups analyses in which the condition factor (cond) was unbalanced. Multi-level models, which are robust to unbalanced designs, agree strongly with the mixed ANOVAs computed with aov.

**Supplementary Table 1**

|               | <b>DAN-VOC DFC conditionXdirectionXhemisphere</b> |          |          |          |
|---------------|---------------------------------------------------|----------|----------|----------|
|               | aov                                               |          | lme4     |          |
|               | <i>F</i>                                          | <i>p</i> | <i>F</i> | <i>p</i> |
| cond          | 15.43                                             | <0.001   | 15.43    | <0.001   |
| dir           | 77.99                                             | <0.001   | 100.30   | <0.001   |
| hemi          | 8.79                                              | <0.01    | 9.11     | <0.01    |
| condXdir      | 9.50                                              | <0.01    | 11.87    | <0.001   |
| condXhemi     | 0.91                                              | n.s.     | 0.94     | n.s.     |
| dirXhemi      | 0.34                                              | n.s.     | 0.35     | n.s.     |
| condXdirXhemi | 4.00                                              | n.s.     | 2.84     | n.s.     |

**Supplementary Table 2**

|               | <b>Within-DAN DFC conditionXdirectionXhemisphere</b> |          |          |          |
|---------------|------------------------------------------------------|----------|----------|----------|
|               | aov                                                  |          | lme4     |          |
|               | <i>F</i>                                             | <i>p</i> | <i>F</i> | <i>p</i> |
| cond          | 4.69                                                 | <0.05    | 4.69     | <0.05    |
| dir           | 4.89                                                 | <0.05    | 4.95     | <0.05    |
| hemi          | 8.02                                                 | <0.01    | 0.48     | n.s.     |
| condXdir      | 0.33                                                 | n.s.     | 0.36     | n.s.     |
| condXhemi     | 7.52                                                 | <0.05    | 7.68     | <0.01    |
| dirXhemi      | 3.30                                                 | n.s.     | 1.67     | n.s.     |
| condXdirXhemi | 0.28                                                 | n.s.     | 0.02     | n.s.     |

**Supplementary Table 3**

|           | <b>DAN-VOC UFC conditionXhemisphere</b> |          |          |          |
|-----------|-----------------------------------------|----------|----------|----------|
|           | aov                                     |          | lme4     |          |
|           | <i>F</i>                                | <i>p</i> | <i>F</i> | <i>p</i> |
| cond      | 1.82                                    | n.s.     | 1.82     | n.s.     |
| hemi      | 30.17                                   | <0.001   | 5.94     | <0.05    |
| condXhemi | 11.80                                   | <0.01    | 11.80    | <0.01    |

**Supplementary Table 4**

|           | <b>Within-DAN UFC conditionXhemisphere</b> |          |          |          |
|-----------|--------------------------------------------|----------|----------|----------|
|           | aov                                        |          | lme4     |          |
|           | <i>F</i>                                   | <i>p</i> | <i>F</i> | <i>p</i> |
| cond      | 4.69                                       | <0.05    | 4.70     | <0.05    |
| hemi      | 16.01                                      | <0.001   | 0.62     | 0.44     |
| condXhemi | 17.52                                      | <0.001   | 17.52    | <0.001   |

**Supplementary Table 5**

|               | <b>DAN-VOC DFC conditionXdirectionXpair</b> |          |          |          |
|---------------|---------------------------------------------|----------|----------|----------|
|               | aov                                         |          | lme4     |          |
|               | <i>F</i>                                    | <i>p</i> | <i>F</i> | <i>p</i> |
| cond          | 15.43                                       | <0.001   | 15.43    | <0.001   |
| dir           | 77.99                                       | <0.001   | 270.06   | <0.001   |
| pair          | 6.04                                        | <0.001   | 4.62     | <0.001   |
| condXdir      | 9.50                                        | <0.01    | 31.95    | <0.001   |
| condXpair     | 1.28                                        | n.s.     | 1.30     | n.s.     |
| dirXpair      | 3.53                                        | <0.001   | 3.19     | <0.001   |
| condXdirXhemi | 1.61                                        | n.s.     | 1.36     | n.s.     |

**Supplementary Table 6**

|           | <b>DAN-VOC UFC conditionXpair</b> |          |          |          |
|-----------|-----------------------------------|----------|----------|----------|
|           | aov                               |          | lme4     |          |
|           | <i>F</i>                          | <i>p</i> | <i>F</i> | <i>p</i> |
| cond      | 1.82                              | n.s.     | 1.82     | n.s.     |
| pair      | 5.19                              | <0.001   | 4.38     | <0.001   |
| condXpair | 2.1                               | <0.01    | 2.10     | <0.01    |
